# Supplementary material for: Antidepressant Efficacy of Ketamine in Treatment-Resistant Major Depression: A Two-Site Randomized Controlled Trial
Source: Atypon-hosted journal article supplement (doi:10.1176/appi.ajp.2013.13030392), 2013-08-28
Supplement: 1134_ds001.pdf [file 1134_ds001.pdf]

 


Psychiatry Online
